# Supplementary material for: Dose-Effect Determination of a Neuroprotector Fraction Standardized in Coumarins of Tagetes lucida and Bioavailability
Source: MDPI journal article supplement (doi:10.3390/pharmaceutics15030967), 2023-03-17
Supplement: s1 [file s1]

Supplementary Materials

# Dose-effect determination of a neuroprotector fraction standardized in coumarins of *Tagetes lucida* and bioavailability.

Anislada Santibáñez <sup>1, 2</sup>, Maribel Herrera-Ruiz <sup>1</sup>, Manasés González-Cortazar <sup>1</sup>, Pilar Nicasio-Torres <sup>1</sup>, Ashutosh Sharma <sup>2, \*</sup>, and Enrique Jiménez-Ferrer <sup>1, \*</sup>

<sup>1</sup> Centro de Investigación Biomédica del Sur, Instituto Mexicano del Seguro Social, Argentina No. 1 Col Centro, Xochitepec Morelos 62790, Mexico

<sup>2</sup> School of Engineering and Sciences, Tecnológico de Monterrey, Av. Epigmenio González No. 500, San Pablo, Queretaro 76130, Mexico

\* Correspondence: asharma@tec.mx (A.S.); enriqueferrer\_mx@yahoo.com (E.J.-F.)

Table S1. Elution gradient of the analytical method by HPLC-UV for coumarin determination in a bioactive fraction of *T. lucida*

| Time (min) | % A    | % B    |
|------------|--------|--------|
| 0.00       | 100.00 | 0.00   |
| 1.00       | 100.00 | 0.00   |
| 2.00       | 95.00  | 5.00   |
| 3.00       | 95.00  | 5.00   |
| 4.00       | 70.00  | 30.00  |
| 20.00      | 70.00  | 30.00  |
| 21.00      | 50.00  | 50.00  |
| 23.00      | 50.00  | 50.00  |
| 24.00      | 20.00  | 80.00  |
| 25.00      | 20.00  | 80.00  |
| 26.00      | 0.00   | 100.00 |
| 27.00      | 0.00   | 100.00 |
| 28.00      | 100.00 | 0.00   |
| 30.00      | 100.00 | 0.00   |

% A: Aqueous solution of trifluoroacetic acid at 0.5%; %B: acetonitrile.
